# Supplementary material
Source: Research Square preprint supplement (doi:10.21203/rs.3.rs-9824642/v1)
Supplement: Supplementary file 1 [file 99d74c21b1cbb536241bd13a.docx]

| **Table 1** Baseline characteristics of the patients **across the four groups** | | | | | | | | | | | | |
| --- | --- | --- | --- | --- | --- | --- | --- | --- | --- | --- | --- | --- |
| **Characteristics** | **NonH（N=694）** | **SHC（n=189）** | | ***P* a** | | **SHT（n=92）** | | ***P* b** | **MixH（n=64）** | | ***P* c** | |
| Age (years) | 34.00(30.00, 39.00) | 37.00(33.00, 40.00) | | <0.001 | | 35.00(31.00, 39.00) | | 0.302 | 39.00(33.25, 41.00) | | <0.001 | |
| BMI (kg/m²) | 22.00(20.20, 23.40) | 22.30(20.70, 23.85) | | 0.014 | | 23.55(22.03, 25.80) | | <0.001 | 23.90(22.33, 25.15) | | <0.001 | |
| Duration of infertility (mo) | 24.00(12.00, 51.50) | 20.00(12.00, 36.00) | | <0.001 | | 24.00(12.00, 60.00) | | 0.584 | 24.00(12.00, 47.00) | | 0.365 | |
| Antral follicle count in both ovaries | 12.00(7.00, 16.00) | 9.00(6.00, 13.50) | | <0.001 | | 12.00(8.00, 18.75) | | 0.297 | 9.00(7.00, 14.75) | | 0.107 | |
| Laboratory testing |  |  | |  | |  | |  |  | |  | |
| Follicle-stimulating hormone (IU) /liter | 7.04(5.93, 8.34) | 7.44(6.07, 8.75) | | 0.157 | | 6.45(5.38, 7.50) | | 0.002 | 6.64(4.90, 8.15) | | 0.183 | |
| Luteinizing hormone (IU) /liter | 4.29(3.21, 5.82) | 4.16(3.16, 5.54) | | 0.543 | | 3.89(2.54, 5.43) | | 0.025 | 4.37(2.69, 5.41) | | 0.279 | |
| Estradiol (pg/ml) | 140.00(98.64, 194.00) | 158.62(105.72, 218.50) | | 0.097 | | 124.14(84.60, 176.75) | | 0.064 | 122.00(69.68, 191.25) | | 0.122 | |
| Progesterone (ng/ml) | 1.41(0.75, 2.44) | 1.19(0.53, 2.28) | | 0.019 | | 1.08(0.55, 2.31) | | 0.123 | 1.19(0.48, 2.22) | | 0.235 | |
| Prolactin (ng/ml) | 14.55(10.78, 20.03) | 15.25(10.82, 20.82) | | 0.592 | | 13.80(10.30, 19.53) | | 0.279 | 14.51(9.28, 21.55) | | 0.818 | |
| Total testosterone (ng/dl) | 1.03(0.59, 1.65) | 0.91(0.53, 1.59) | | 0.185 | | 0.91(0.50, 1.31) | | 0.136 | 0.94(0.56, 1.44) | | 0.238 | |
| TSH （uIU/ml） | 1.93(1.35, 2.61) | 2.26(1.48, 2.95) | | 0.005 | | 2.23(1.55, 3.02) | | 0.031 | 1.92(1.47, 2.59) | | 0.599 | |
| NonH, nonhyperlipidemia; SHC, simple hypercholesterolemia; SHT, simple hypertriglyceridemia; MixH, mixed hyperlipidemia | | | | | | | | | | | | |
| *P* a: NonH group VS SHC group; *P* b: NonH group VS SHT group; *P* c: NonH group VS MixH group | | | | | | | | | | | | |
| Table 2 Outcomes of PGT-A cycles across the four groups | | | | | | | | | | | | |
| **Parameters** | | | **NonH (n=694)** | | **SHC (n=189)** | | ***P* a** | | | **SHT (n=92)** | | ***P* b** | | **MixH (n=64)** | ***P* c** |
| **Ovarian stimulation parameters** | | |  | |  | |  | | |  | |  | |  |  |
| Duration of ovarian stimulation （days） | | | 10.00(9.00, 11.00) | | 10.00(8.50, 11.00) | | 0.358 | | | 10.00(9.00, 11.00) | | 0.031 | | 9.50(8.00, 11.00) | 0.343 |
| Total gonadotropin dosage （IU） | | | 2200.00(1800.00, 2700.00) | | 2300.00(1875.00, 3000.00) | | 0.014 | | | 2612.50(2071.88, 3037.50) | | <0.001 | | 2250.00(2000.00, 2793.75) | 0.262 |
| Endometrial thickness on hCG trigger day （mm） | | | 10.60(8.90, 12.00) | | 10.20(8.35, 11.55) | | 0.083 | | | 10.15(8.93, 11.80) | | 0.352 | | 9.55(8.05, 11.78) | 0.035 |
| **Oocyte and fertilization outcomes** | | |  | |  | |  | | |  | |  | |  |  |
| No. of retrieved oocytes per cycle | | | 11.00(7.00, 17.00) | | 9.00(6.00, 15.00) | | 0.021 | | | 12.00(8.25, 17.00) | | 0.126 | | 10.00(7.25, 13.00) | 0.061 |
| No. of MII oocytes per cycle | | | 6.00(4.00, 10.00) | | 7.00(4.00, 12.00) | | 0.08 | | | 6.00(4.00, 10.00) | | 0.089 | | 7.50(5.00, 10.00) | 0.05 |
| No. of 2PNs per cycle | | | 6.00(4.00, 10.00) | | 5.00(3.00, 9.00) | | 0.346 | | | 7.00(4.00, 11.00) | | 0.164 | | 5.50(3.00, 7.75) | 0.056 |
| **Embryo development outcomes** | | |  | |  | |  | | |  | |  | |  |  |
| No. of blastocysts per cycle | | | 4.00(2.00, 6.00) | | 3.00(2.00, 6.00) | | 0.378 | | | 4.00(2.00, 7.00) | | 0.268 | | 3.00(2.00, 5.00) | 0.006 |
| No. of high-quality blastocysts | | | 3.00(1.00, 5.00) | | 3.00(1.00, 5.00) | | 0.408 | | | 3.00(2.00, 4.00) | | 0.232 | | 2.00(1.00, 4.00) | 0.005 |
| **Result on preimplantation genetic testing (no.)/total no. (%)** | | |  | |  | |  | | |  | |  | |  |  |
| Balanced euploid | | | 929/3161（29.4%） | | 164/850（19.3%） | | <0.001 | | | 126/440（28.6%） | | 0.731 | | 35/215（16.3%） | <0.001 |
| Aneuploid | | | 1470/3161（46.5%） | | 501/850（58.9%） | | <0.001 | | | 208/440（47.3%） | | 0.74 | | 136/215（63.3%） | <0.001 |
| Chromosomal mosaic | | | 622/3161（19.7%） | | 145/850（17.1%） | | 0.071 | | | 92/440（20.9%） | | 0.54 | | 32/215（14.9%） | 0.089 |
| Questionable | | | 140/3161（4.4%） | | 40/850（4.7%） | | 0.711 | | | 14/440（3.2%） | | 0.247 | | 12/215（5.6%） | 0.391 |
| NonH, nonhyperlipidemia; SHC, simple hypercholesterolemia; SHT, simple hypertriglyceridemia; MixH, mixed hyperlipidemia | | | | | | | | | | | | | | | |
| *P* a: NonH group VS SHC group; *P* b: NonH group VS SHT group; *P* c: NonH group VS MixH group | | | | | | | | | | | | | | | |

| **Table 3** The associations between hypercholesterolemia and embryo aneuploidy | | | | |
| --- | --- | --- | --- | --- |
| **Variables** | **Crude OR (95% CI)** | ***P*** | **Adjusted OR (95% CI)** | ***P*** |
| Nonhyperlipidemia group (NonH) | Ref. | - | Ref. | - |
| Simple hypercholesterolemia group (SHC) | 1.732(1.434–2.092) | <0.001 | 1.342(1.121–1.606) | 0.001 |
| Simple hypertriglyceridemia group (SHT) | 1.031(0.814–1.305) | 0.8 | 0.908(0.714–1.154) | 0.431 |
| Mixed hyperlipidemia group (MixH) | 1.861(1.404–2.465) | <0.001 | 1.280(0.951–1.724) | 0.103 |
| Age | 1.091(1.073–1.110) | <0.001 | 1.089(1.070–1.108) | <0.001 |
| BMI | 1.019(0.994–1.044) | 0.145 | 1.018(0.993–1.043) | 0.17 |
| Antral follicle count | 0.980(0.968–0.993) | 0.002 | 0.980(0.967–0.992) | 0.002 |

| **Table 4** The associations between hypercholesterolemia and the cumulative live-birth rate | | | | |
| --- | --- | --- | --- | --- |
| **Variables** | **Crude OR (95% CI)** | ***P*** | **Adjusted OR (95% CI)** | ***P*** |
| Nonhyperlipidemia group | Ref. | - | Ref. | - |
| Simple hypercholesterolemia group | 0.667(0.469–0.949) | 0.024 | 0.909(0.627–1.317) | 0.614 |
| Simple hypertriglyceridemia group | 1.051(0.671–1.645) | 0.829 | 1.112(0.692–1.788) | 0.66 |
| Mixed hyperlipidemia group | 0.570(0.317–1.025) | 0.061 | 0.803(0.434–1.487) | 0.485 |
| Age | 0.896(0.870–0.923) | <0.001 | 0.898(0.871–0.926) | <0.001 |
| BMI | 0.999(0.953–1.048) | 0.977 | 0.999(0.952–1.049) | 0.976 |
| Antral follicle count | 1.022(0.997–1.048) | 0.084 | 1.021(0.996–1.048) | 0.096 |

| **Table 5** Dose-response association analysis between serum total cholesterol level and the risk of embryonic aneuploidy | | | | | |
| --- | --- | --- | --- | --- | --- |
| Variable | β Coefficient | Standard Error | Wald χ² | *P* | Adjusted OR (95% CI) |
| Serum total cholesterol (mmol/L) | 0.158 | 0.041 | 14.524 | <0.001 | 1.171 (1.080, 1.270) |
| Age-years | 0.084 | 0.009 | 91.945 | <0.001 | 1.087 (1.069, 1.106) |
| BMI-kg/m² | 0.016 | 0.012 | 1.629 | 0.202 | 1.016 (0.992, 1.041) |
| Antral follicle count | -0.022 | 0.007 | 11.285 | <0.001 | 0.978 (0.965, 0.991) |
| Intercept | -3.581 | 0.421 | 72.467 | <0.001 | 0.028 (0.012, 0.064) |

| **Table 6** Association between blood lipid phenotypes and embryonic aneuploidy risk in different age groups | | | | | |
| --- | --- | --- | --- | --- | --- |
| Lipid phenotype | <38 years old group (n = 3771 embryos) | |  | ≥38 years old group (n = 895 embryos) | |
|  | Adjusted OR (95% CI) | *P* |  | Adjusted OR (95% CI) | *P* |
| Nonhyperlipidemia group | 1 | - |  | 1 | - |
| Simple hypercholesterolemia group | 1.432 (1.165-1.761) | <0.001 |  | 1.218 (0.818-1.814) | 0.333 |
| Simple hypertriglyceridemia group | 0.942 (0.725-1.224) | 0.654 |  | 0.954 (0.560-1.626) | 0.863 |
| Mixed hyperlipidemia group | 1.596 (1.049-2.427) | 0.029 |  | 0.821 (0.527-1.281) | 0.385 |
| Global effect of lipid group | Wald χ² = 16.259, df = 3, *P* = 0.001 |  |  | Wald χ² = 2.952, df = 3, *P* = 0.399 |  |
